# Supplementary material for: Epigenetic maintenance of topological domains in the highly rearranged gibbon genome
Source: PubMed Central journal article supplement — Genome Res. 2018 Jul;28(7):983–97. doi: 10.1101/gr.233874.117 (PMC6028127; doi:10.1101/gr.233874.117), 2018-07
Supplement: supp_gr.233874.117_Supplemental_Fig_S1.pdf [file supp_gr.233874.117_Supplemental_Fig_S1.pdf]

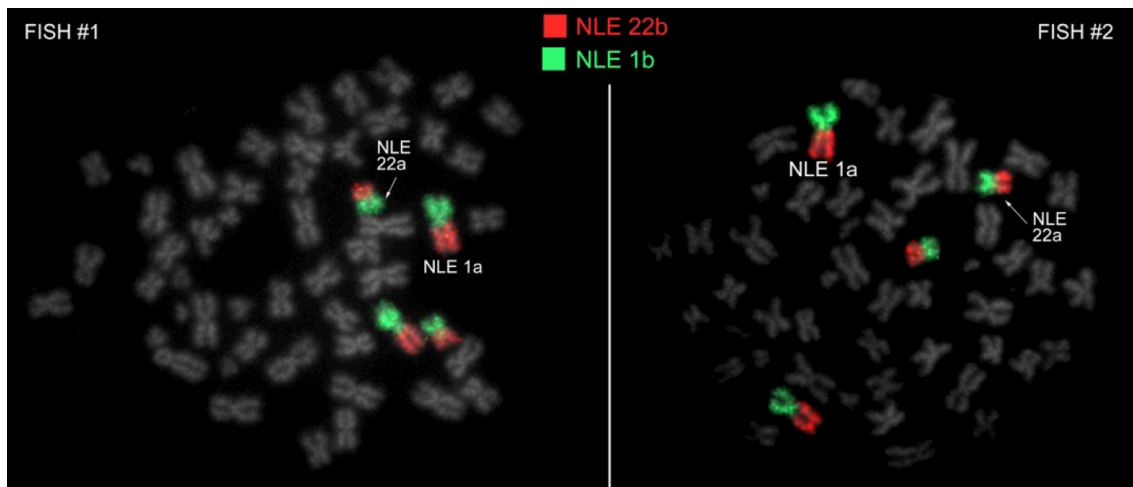

**Supplemental Figure S1** – Two examples of chromosome spreads from *Vok* chromosome painting FISH experiment showing the reciprocal translocation between NLE1 and NLE22. *Vok* carries NLE1/22a while the probes are NLE1/22b.
