# Supplementary material for: Epigenetic maintenance of topological domains in the highly rearranged gibbon genome
Source: PubMed Central journal article supplement — Genome Res. 2018 Jul;28(7):983–97. doi: 10.1101/gr.233874.117 (PMC6028127; doi:10.1101/gr.233874.117), 2018-07
Supplement: supp_gr.233874.117_Supplemental_Fig_S2.pdf [file supp_gr.233874.117_Supplemental_Fig_S2.pdf]

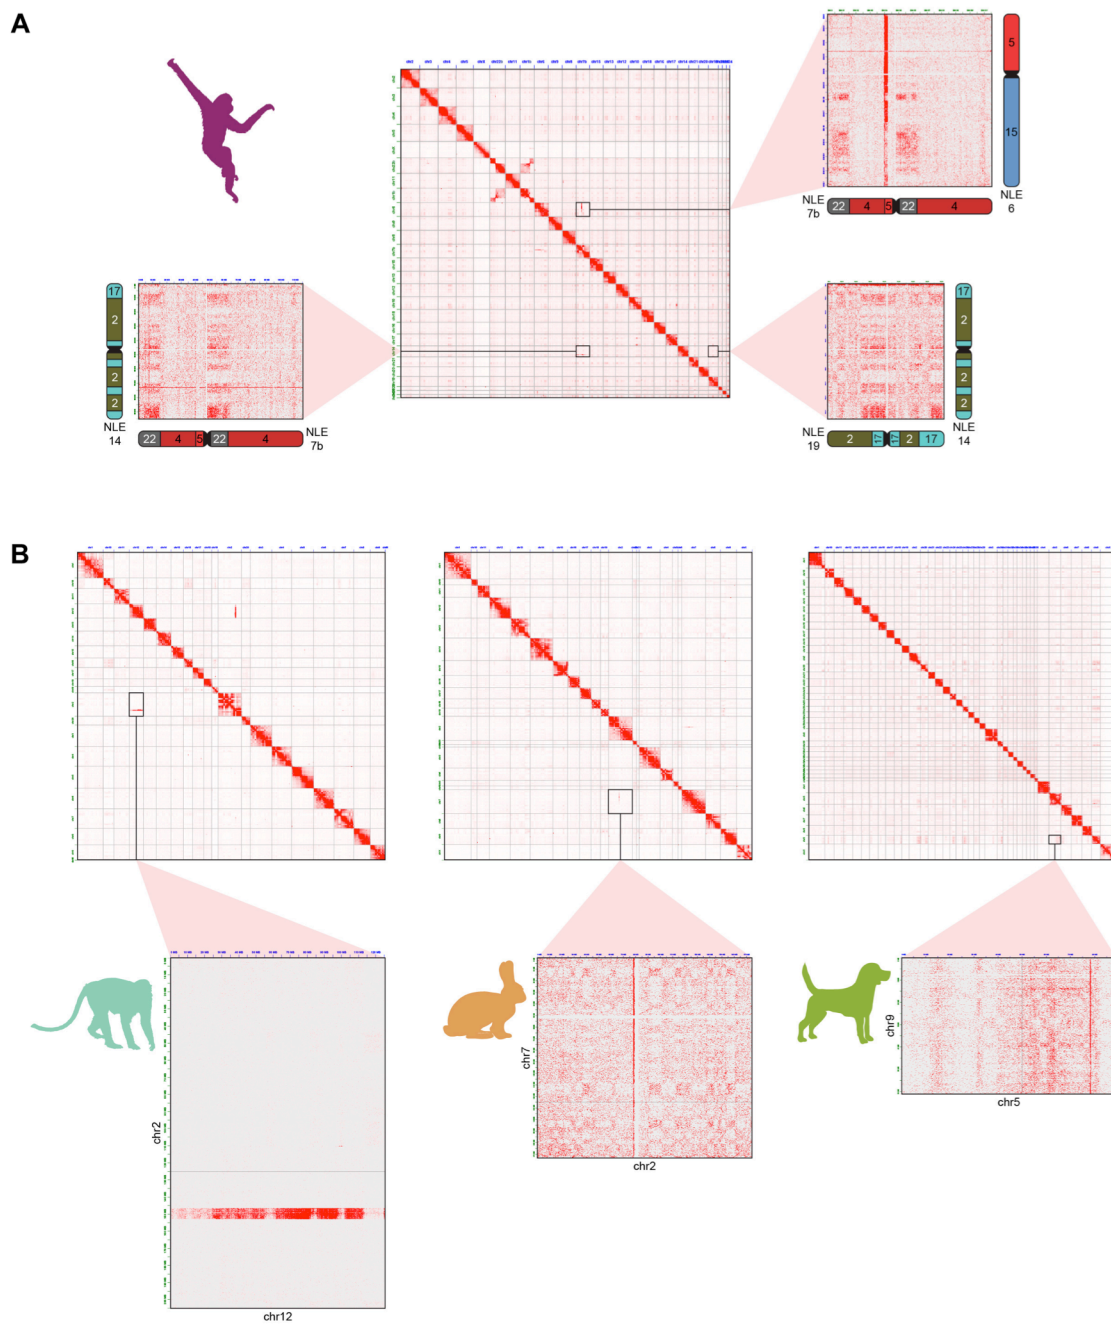

**Supplemental Figure S2** – A) Examples of trans interactions: chromosomal regions that were separated more recently show similar interactions with other chromosomes. A strong inter-chromosomal interaction appearing like a strong band was identified between NLE6 and NLE7, indicative of a small translocation or assembly error. B) Similar to what observed in gibbon, strong signals of inter-chromosomal chromatin contacts, suggesting translocations and/or issues with the genome assembly were detected in rhesus, rabbit, and dog.
