# Supplementary material for: Epigenetic maintenance of topological domains in the highly rearranged gibbon genome
Source: PubMed Central journal article supplement — Genome Res. 2018 Jul;28(7):983–97. doi: 10.1101/gr.233874.117 (PMC6028127; doi:10.1101/gr.233874.117), 2018-07
Supplement: supp_gr.233874.117_Supplemental_Fig_S5.pdf [file supp_gr.233874.117_Supplemental_Fig_S5.pdf]

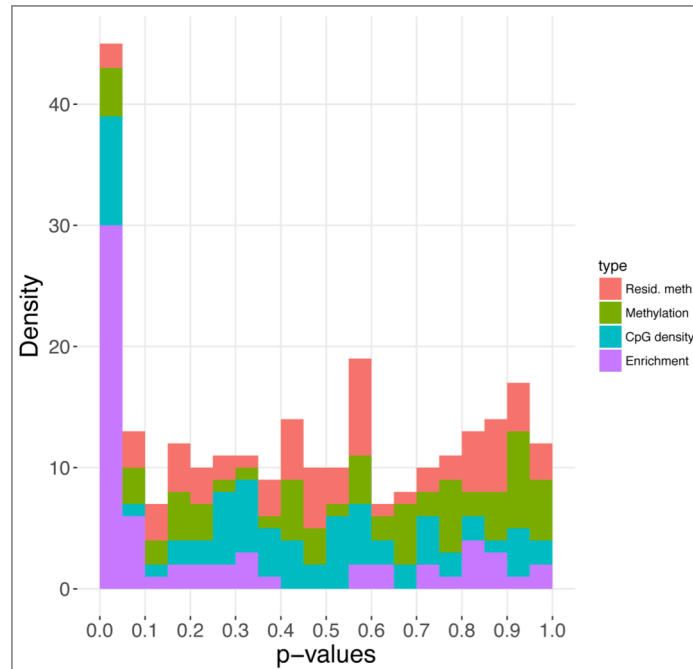

**Supplemental Figure S5** - Histogram of p-values testing for differences between BOS regions and permutation regions. Data is binned in 0.05 intervals and the bar on the left represents p-values below 0.05 with no multiple test correction. If there were no real effects, we'd expect the p-values uniformly distributed between zero and one. Color-coding shows whether the test was looking at enrichment, CpG density, methylation, or residual methylation.
