# Supplementary material for: Epigenetic maintenance of topological domains in the highly rearranged gibbon genome
Source: PubMed Central journal article supplement — Genome Res. 2018 Jul;28(7):983–97. doi: 10.1101/gr.233874.117 (PMC6028127; doi:10.1101/gr.233874.117), 2018-07
Supplement: supp_gr.233874.117_Supplemental_Fig_S6.pdf [file supp_gr.233874.117_Supplemental_Fig_S6.pdf]

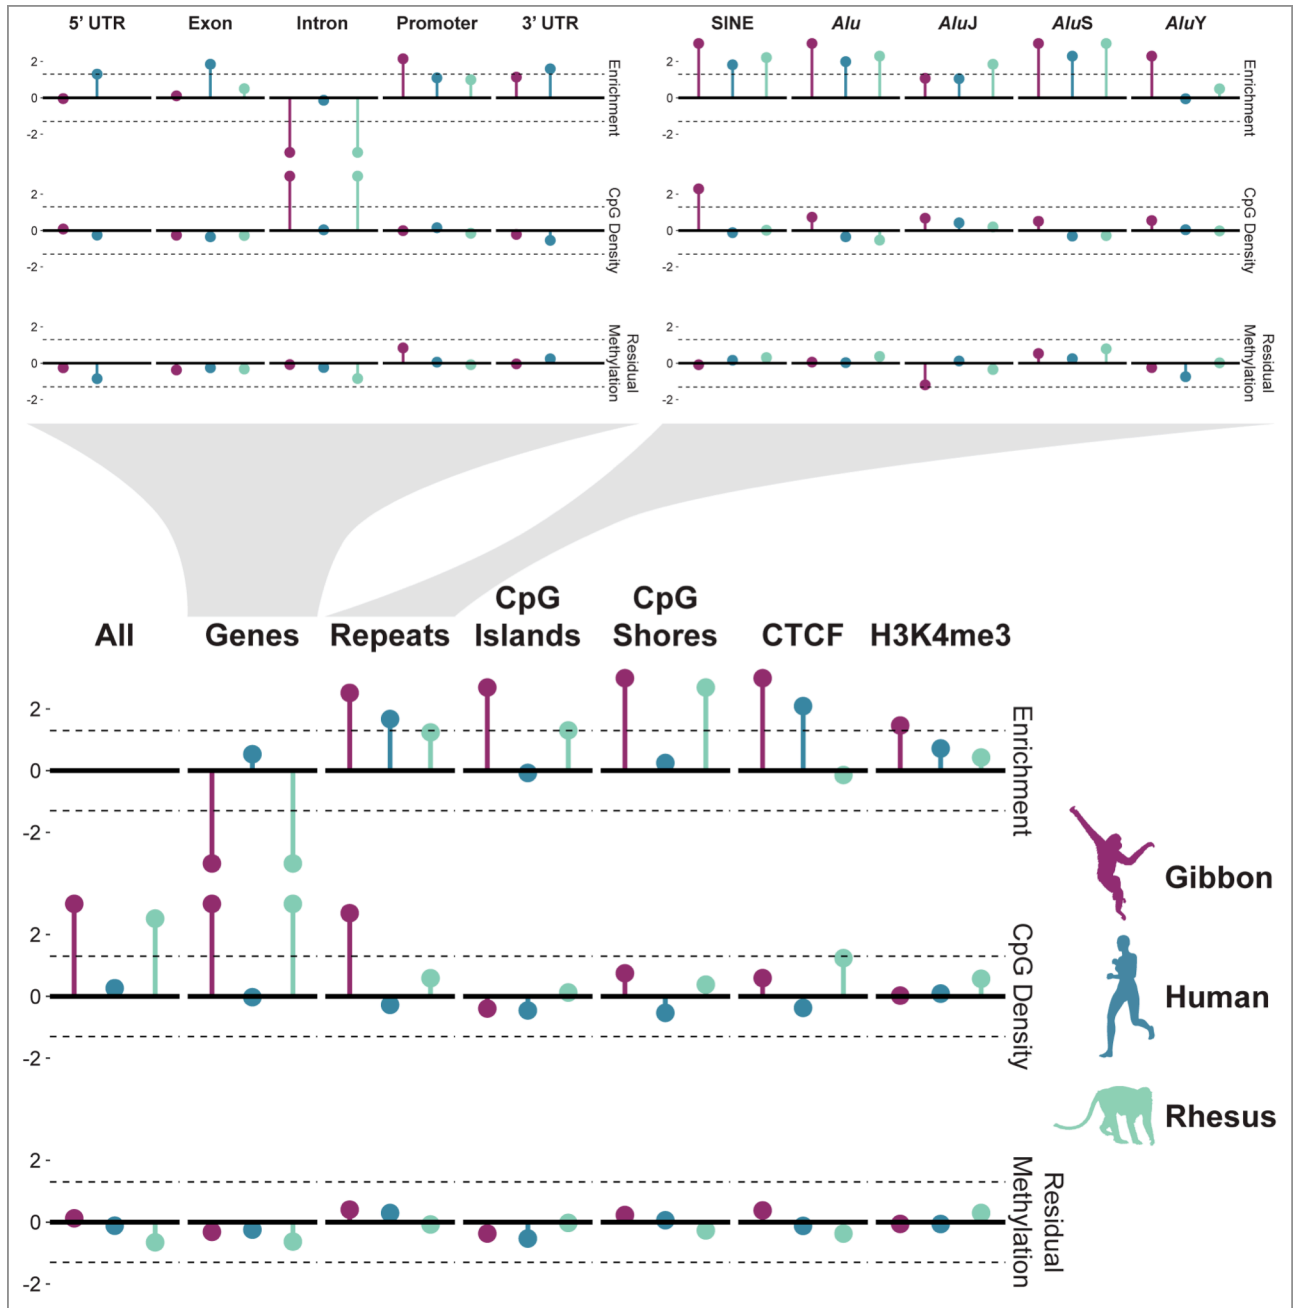

**Supplemental Figure S6** - The 'lollipop' plot summarizes permutation analyses testing differences in enrichment of genomic features, CpG density, and residual methylation between the gibbon BOS and the rest of the genome. Regions orthologous to the gibbon BOS were used for human and rhesus. Negative  $\log_{10}$  two-sided p-values from 1,000 permutations are represented as points above zero when values in BOS are greater than the permutation mean and below zero when less. Dotted lines mark 0.05 significance threshold with no multiple-test correction.
