# Supplementary material for: Epigenetic maintenance of topological domains in the highly rearranged gibbon genome
Source: PubMed Central journal article supplement — Genome Res. 2018 Jul;28(7):983–97. doi: 10.1101/gr.233874.117 (PMC6028127; doi:10.1101/gr.233874.117), 2018-07
Supplement: supp_gr.233874.117_Supplemental_Fig_S9-2.pdf [file supp_gr.233874.117_Supplemental_Fig_S9-2.pdf]

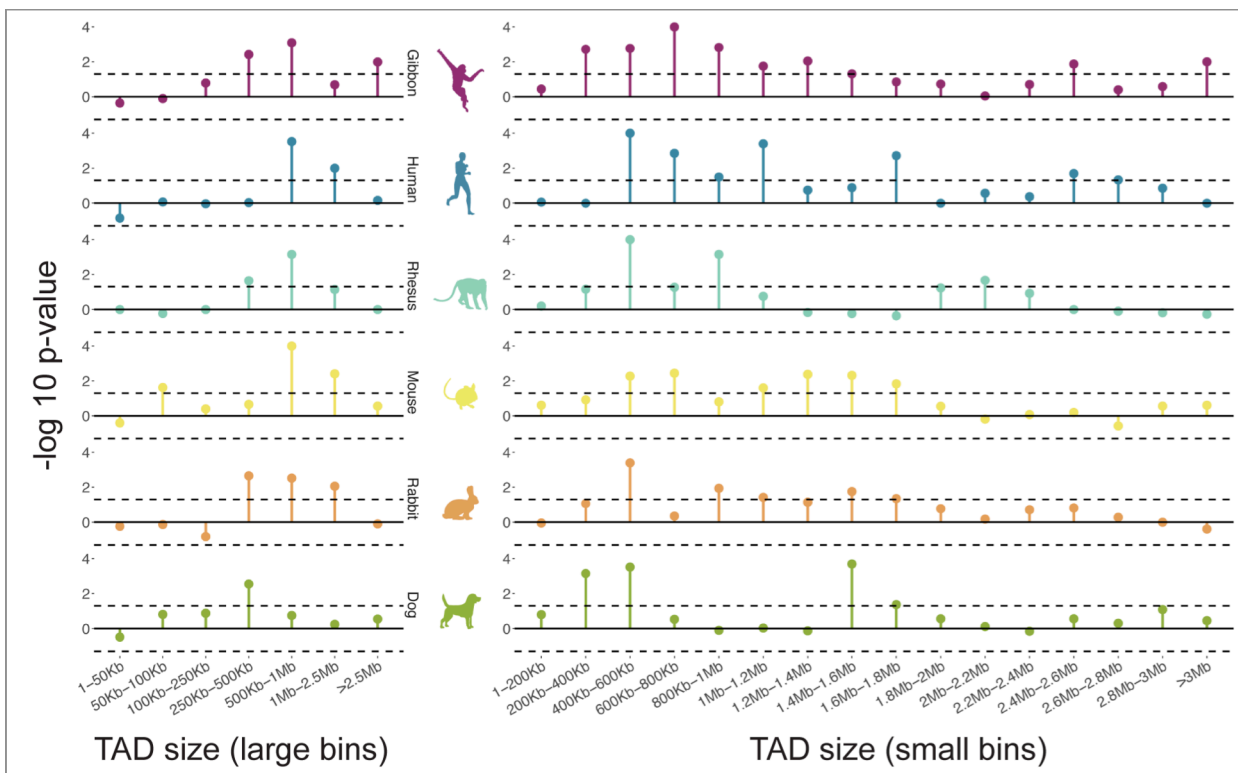

**Supplemental Figure S9** - Lollipop plots show the result of permutation analyses (10,000 permutations) to test the overlap between TADs binned by size (different ranges showed left and right) and BOS regions (y-axis =  $-\log_{10} p\text{-values}$ ). Dotted line marks 0.05 significance threshold with no multiple-test correction. Cross-species comparison points to conservation of boundaries for 500kb-1Mb and 400-600kb TADs.
