# Supplementary material for: Epigenetic maintenance of topological domains in the highly rearranged gibbon genome
Source: PubMed Central journal article supplement — Genome Res. 2018 Jul;28(7):983–97. doi: 10.1101/gr.233874.117 (PMC6028127; doi:10.1101/gr.233874.117), 2018-07
Supplement: supp_gr.233874.117_Supplemental_Table_S4.pdf [file supp_gr.233874.117_Supplemental_Table_S4.pdf]

|                         | <b>Species</b> | <b><math>\Delta</math>CpG</b> | <b><math>\Delta</math>Meth</b> | <b><math>\Delta</math>H3K4me3</b> |
|-------------------------|----------------|-------------------------------|--------------------------------|-----------------------------------|
| <b>Adjacent Regions</b> | Gibbon         | p<0.001                       | p=0.054                        | p<0.001                           |
|                         | Human          | p<0.001                       | p=0.006                        | p<0.001                           |
|                         | Rhesus         | p<0.001                       | p<0.001                        | p=0.002                           |
| <b>Distal Regions</b>   | Gibbon         | p=0.137                       | p=0.810                        | p=0.159                           |
|                         | Human          | p=0.278                       | p=0.171                        | p=0.921                           |
|                         | Rhesus         | p=0.358                       | p=0.099                        | p=0.230                           |

**Supplemental Table S4** - Two-sided p-values from the permutation analyses for each species are reported.
