# Supplementary material for: Epigenetic maintenance of topological domains in the highly rearranged gibbon genome
Source: HighWire-hosted journal article supplement (doi:10.1101/gr.233874.117), 2018-06-18
Supplement: Supplemental_Methods.docx [file Supplemental_Methods.docx]

**Supplemental Material**

**The genomic false shuffle: epigenetic maintenance of topological domains in the rearranged gibbon genome.**

Nathan H. Lazar1, Kimberly A. Nevonen2, Brendan O’Connell3, Richard E. Green3, Thomas J. Meyer1, Mariam Okhovat2, Lucia Carbone1,2,4*

1Bioinformatics and Computational Biology Division, Department of Medical Informatics & Clinical Epidemiology, Oregon Health & Science University, Portland, OR;

2Department of Medicine, Knight Cardiovascular Institute, Oregon Health & Science University, Portland, OR;

3Department of Biomolecular Engineering, University of California, Santa Cruz

4Primate Genetics Section, Oregon National Primate Research Center, Beaverton, OR

*To whom correspondence should be addressed:

Lucia Carbone, Ph.D.

Oregon Health & Science University

3303 SW Bond Avenue

Portland, OR 97239

Email: [carbone@ohsu.edu](mailto:carbone@ohsu.edu)

Phone: 503 494-7342

**SM1 - SUPPLEMENTAL EXPERIMENTAL METHODS**

**SM1.1 Establishment of EBV-transformed gibbon cell line**

**SM1.2 Fluorescent *in situ* hybridization (FISH)**

**SM2 - SUPPLEMENTAL ANALYSIS METHODS AND RESULTS**

**SM2.1 Signals of translocations from the Hi-C matrix**

**SM2.2. Definition of genomic features**

**SM2.3. Examination of the genomic and epigenetic landscape of BOS**

**SM2.4 Determining the effect of parameters on TAD count and sizes**

**SM2.5 Permutation analyses to determine overlap between TAD boundaries and BOS**

**SM2.6 Analysis of the relationship between TAD size and BOS**

**SM2.7 Permutation analysis to test difference between the two sides of the BOS**

**SM1 - EXPERIMENTAL METHODS**

**SM1.1 – Establishment of EBV-transformed gibbon cell line**

Whole blood from a male *Nomascus leucogenys* gibbon (Vok, ISIS# NLL600) was opportunistically collected during routine check-up in a sodium heparin tube at the Gibbon Conservation Center (Santa Clarita, CA). Lymphocytes from whole blood were isolated using Ficoll-Paque PLUS (GE Healthcare). Using a standard protocol, 3-9x106 lymphocytes were transformed using Epstein Barr Virus from the marmoset cell line B95-8 (ATCC CRL-1612). Cells were incubated with the virus for 2 hours at 37°C then diluted with RPMI-1640 (Corning cellgro) supplemented with 10% FBS (Hyclone), 1X MEM Non-essential Amino Acids Solution (Corning cellgro), 1mM Sodium pyruvate (Corning cellgro) 1% Pen-Strep (Corning cellgro) and 2mM L-glutamine (Hyclone). Cells were allowed to grow for 7 to 10 days. Once signs of transformation were observed, cells were slowly fed with the same supplemented RPMI-1640 until robust growth occurred.

**SM1.2 Fluorescent *in situ* hybridization (FISH)**

Chromosomes of *Vok* were prepared according to standard methods. Following RNase treatment at 37˚C for 15 minutes, slides were serially treated in 0.2M HCl at room temperature for 10 minutes, 2XSSC briefly and an ethanol dehydration series (70%, 90%, 100%). Slides were then denatured in 70% formamide/2XSSC for 2 minutes at 72˚C, followed by an ice-cold ethanol dehydration series. Probe DNA was prepared from human chromosome paints NLE1 and NLE22b using degenerate primed PCR (DOP-PCR) and incorporating digoxegenin and biotin, respectively. A mixture of 5µl of each labeled probe, 20µg of salmon sperm and 4µg of human Cot-1 DNA was precipitated and rehydrated in 12µl of Hybrisol VII hybridization buffer for 90 minutes. The probe combination was denatured at 75˚C for 5 minutes, followed by a 15-minute pre-annealing step at 37˚C, and ending with hybridization to the slide overnight at 37˚C. Post-hybridization washes included one wash in 0.4XSSC/0.3% NP40 for 2 minutes at 72˚C followed by a wash in 2XSSC/0/1% NP40 for 1 minute at room temperature. Slides were blocked in 5%BSA/4XSSC/0.2% Tween 20 for 30 minutes at 37˚C followed by incubation with a combination of avidin Texas red (1:200 dilution in blocking solution) and anti-DIG fluorescein (1:400 dilution in blocking solution) at 37˚C for 30 minutes. Post detection, the slides were rinsed three times, 5 minutes each, in 4XSSC/0.2% Tween 20 at 45˚C, followed by a brief rinse in water and serial ethanol dehydration and mounting in Vecta shield with DAPI (for a counterstain). Images were captured on an Applied Imaging Genus System and an Olympus AX-70. Examples of two images are shown in **Supplemental Fig S1**.

**SM2 - ANALYSIS METHODS AND RESULTS**

**SM2.1 Signals of translocations from the Hi-C matrix**

We observed a few instances of inter-chromosomal ghost interactions. In particular we saw interactions between portions of NLE14 and NLE19 corresponding to human chromosome 17 that were stronger than background **(Supplemental Fig S2A)**. Moreover, regions that were separated by recent evolutionary rearrangements, display similar patterns of interaction with other chromosomes in *trans.* For example*,* along NLE7, the chromosomal segments homologous to human chromosome 22 all display strong inter-chromosomal interaction with NLE2 and NLE6, while overall, the rest of NLE7 exhibits weaker interaction with these chromosomes. Hi-C data from non-gibbon species also show strong inter-chromatin signals of chromatin contacts, indicative of translocations or errors in the reference genome. The most evident are shown here for and rhesus, rabbit, and dog **(Supplemental Fig S2B)**.

**SM2.2. Definition of genomic features and data sources**

Genomic features examined in this study were genes, repetitive elements, CpG islands, CpG shores, CTCF peaks and H3K4me3 peaks in the reference genomes of gibbon (Nleu3.0), human (hg38) and rhesus (rheMac8). Locations of genes, repetitive elements and CpG islands were obtained from the UCSC table browser (Karolchik et al., 2004). For gibbon, we used the Gencode gene model (41,539 genes) generated and kindly provided by Ian Fiddes (University of California, Santa Cruz), and for human and rhesus we used Ensembl gene sets (57,955 and 56,743 genes respectively). The locations and families of repetitive elements were determined using the RepeatMasker track from UCSC (Smit, 1996) (4,995,993, 5,520,017 and 5,795,052 elements in gibbon, human and rhesus, respectively). The CpG island tracks identified 65,791, 30,477 and 6,670 loci in gibbon, human and rhesus respectively while CpG shores were identified as 1kb regions flanking CpG islands provided that they did not overlap with another CpG island. ChIP-seq peaks for CTCF binding (N= 52,686) for gibbon were previously published (Carbone et al. 2014) and here were translated to the most recent gibbon assembly (Nleu3.0) using the UCSC LiftOver tool (N=50,746 peaks). For both human and rhesus, ChIP-seq data for CTCF binding were publicly available (Vietri Rudan et al., 2015) (N=40,789 and 32,325 peaks respectively). ChIP-seq peaks for H3K4me3 for gibbon and rhesus (N=20,828 and N=21,738 peaks respectively) were obtained as described in the methods starting from the raw data generated for this study and publicly available (Zhou et al., 2014), respectively. For human, peaks from the lymphoblastoid cell line GM12878 were downloaded from Encode (N=48,977 peaks; file id: ENCFF505CKO).

**SM2.3. Characterization of the genomic and epigenetic landscape of BOS**

In order to compare characteristics of BOS regions to the rest of the genome, we performed a number of permutation analyses in R (v3.3.3) (Team, 2008). These permutations consisted of choosing 1,000 sets of regions with the same chromosomal distribution and sizes as the 10kb regions flanking both sides of gibbon-human BOS **(Supplemental Table S1)** and then comparing measurements in these sets to the BOS regions **(Supplemental Fig S3)**.

For the simulations performed in the gibbon genome, regions were chosen preserving the distances between the two sides of breakpoints, that can be 1bp or larger when gibbon repeats are inserted within the breakpoint. No regions were chosen within 10kb of the end of chromosomes to avoid issues with repetitive and poorly assembled telomere sequences. In each of the BOS regions and the random regions, we assessed enrichment of features (genes, repetitive elements, CpG islands, etc.) as the fraction of the region covered by the feature, the number of CpGs per 1kb and the average methylation rate, as well as the CpGs per kb, and residual methylation rates within each of the features. We performed the same analyses in human and rhesus macaque using WGBS publicly available data for human (Ruiz-Herrera and Robinson, 2008) and data available in house for rhesus (Ac.N. *pending*).

There is a well-known correlation between methylation and CpG density, and this correlation differs depending on the genomic context, so we also calculated the residual methylation rate by performing logistic regressions for each feature **(Supplemental Fig S4)**. The response variable in this analysis was the average methylation rate across regions or features, and the input variable was the CpG count per 1kb of sequence. We compared the average enrichment, CpG density, methylation, and residual methylation across all BOS regions to averages in each of the 1,000 permutation groups.

Group-level two-sided p-values were calculated as the proportion of the simulations that showed values as extreme as the BOS regions either above or below the mean. As these analyses were primarily intended to characterize the breakpoint regions and there may be dependency structure between the different permutation tests, we did not perform multiple test corrections. We instead show a histogram of the p-values indicating that there are some real effects, primarily from feature enrichment and CpG density **(Supplemental Fig S5)**.

We compared methylation rates between BOS and the rest of the genome separately for various genomic features (*e.g.* repeats, gene elements (introns, exons and promoters), CpG Islands, and CpG shores) **(Supplemental Fig S6)**. Although residual methylation does not seem to differ significantly for BOS, CpG density in BOS deviates significantly from the rest of the genome (two-sided permutation p-value: <0.001). This signal is driven by genes and repeats and indicates that these regions likely had low CpG methylation in ancestral genomes as methylated cytosines deaminate faster than unmethylated cytosines (Shen JC, 1994). The higher-than-expected CpG density in genes occurs mainly in introns both in gibbon and rhesus. Inspecting the breakdown of repeat families in gibbon, we observed enrichment and high CpG density specifically in SINE elements (**Supplemental Fig S6**, upper panel). Within SINEs, the oldest *Alu* family (*Alu*J) has the lowest residual methylation when compared *to* *AluJ* elements in the rest of the genome (two-sided permutation p-value: 0.065) and this signal is not present in human or rhesus.

### SM2.4 Determining the effect of parameters on TAD count and sizes

Visual inspection of Hi-C contact maps reveals associating domains nested within each other on various scale levels and, as a result, when calling TADs, the algorithm and parameters used can have a large impact on the set of domains that are identified (Kruse et al., 2016). We found large differences in TAD positions depending on parameter settings used, underlying the importance of evaluating different settings when calling TADs. The number and sizes of TADs that were identified varied along with these parameters, with matrix resolution having the most pronounced effect **(Supplementary Fig. S7)**. For instance, in the gibbon Hi-C data, using a window size of 2Mb, a cut off of 0.05 and a resolution of 25Kb we identify 11,682 TADs with a median size of 150Kb but if we change the resolution to 500Kb, we get only 1,413 TADs with a median size of 1.5Mb. Similar results were observed for the other species (data not shown).

**SM2.5 Permutation analyses to determine overlap between TAD boundaries and BOS**

We performed permutation analyses to determine whether the overlap between BOS regions and TAD boundaries was different than what would be expected by chance. In each species, we permuted 10,000 BOS regions while preserving their chromosomal distribution and size. In gibbon, the two sides of BOS were treated as a single region including any synteny gap between the sides. Then, for each of the 140 parameter settings described in the Hi-C data analysis section, we counted how many BOS regions overlapped TAD boundaries (by at least 1bp) and compared this to the number of random regions overlapping TAD boundaries in each of the permutations. Since the location of a TAD boundaries can only be specified up to the resolution of the contact matrix used when calling TADs, TAD boundaries were defined as a window twice the resolution size centered at the boundary called. Two-sided group-wise permutation p-values were obtained by counting the number of permutation groups with a number of overlaps as far from the mean as the BOS regions. The results are shown in **Supplemental Fig S8**.

**SM2.6 Analysis of the relationship between TAD size and BOS**

In order to test for associations with TADs of particular sizes, TADs called by all parameter settings were grouped according to TAD size and the number of overlaps of BOS regions with TAD boundaries of each size group was assessed. We tested two sets of TAD size bins. The first are variably sized and had roughly the same number of TADs per bin in gibbon (1bp-50kb, 50-100kb, 100-250kb, 250-500kb, 500kb-1Mb, 1-2.5Mb and greater than 2.5Mb) while the second were evenly spaced at 200kb (1bp-200kb, 200-400kb … 2.8Mb-3Mb and greater than 3Mb) **(Supplemental Fig S9)**.

Two-sided p-values were obtained as for SM2.2. When we examined the bins in more detail for the gibbon, we noticed that similar numbers of BOS overlapping TAD boundaries fall within three size bins from 200kb to 800kb. Specifically, 47/67 BOS overlap with boundaries of TADs in the 200-400kb and 400-600kb bins (70.15%, p-values: 0.0019, 0.0017) while 44/67 BOS overlap with boundaries of TADs in the 600-800kb group (65.67%, p-value: 0.0001). Moreover, 60/67 (89.55%) of the BOS overlap with boundaries of TADs in at least one of these size groups. When intersecting the three different bins we see that 30 BOS/Bound are shared **(Supplemental Fig S10A)**. To identify regions corresponding to TAD boundaries in the primate common ancestor and examine whether their establishment have preceded chromosomal rearrangements in gibbon, we queried the number of TAD boundaries that overlap with orthologous BOS loci in human and rhesus. We identified 43 BOS in the 400-600Kb TAD bin, which was significantly larger than expected by chance (two-sided p-value = 0.0185). In the 500Kb-1Mb TAD bin, 56 overlaps were identified, but this observation was not statistically significant (two-sided p-value ≈ 1.0), likely due to the large fraction of BOS that overlap boundaries of TADs of this size in each species (**Supplemental Fig S10B)**.

Finally, we asked whether it was largely the same regions homologous to gibbon BOS that were overlapping with TAD boundaries (BOS/Boundary) in each species, or if a different set of these regions overlapped TADs boundaries in each species. To address this, we focused on BOS overlapping TADs in two size bins, 500kb – 1Mbp and 400kb – 600kb and performed a permutation analysis where we chose BOS at random 10,000 times from each species and counted the number of times BOS were shared between 2, 3, 4, 5 or 6 species. To avoid issues where BOS overlapping with boundaries shared in more species subtracts from counts of these shared in less species, we assess the total number of pairs, triples, etc. For example, if a BOS overlapping with boundary was shared between four species, it would be counted as 6 species pairs, 4 triples and 1 quadruple. Two-sided p-values were calculated as the proportion of permutations showing a value as extreme as that observed in the real data **(Supplemental Fig. S11).**

**SM2.7 Permutation analysis to test difference between the two sides of the BOS.**

We performed comparisons between absolute differences measured for the two sides of the BOS to both a set of random regions that are continuous in the genome, similar to how BOS are in the gibbon genome, (i.e. adjacent) and to regions where each side is chosen separately in the genome (i.e. distal) **(Supplemental Fig S12)**. Two-sided permutation p-values for comparisons with both the adjacent and distal sets of regions were obtained as described in SM2.3 by counting the sets of regions showing differences between the two sides as far from the mean as was observed in the BOS regions. In order to further support the hypothesis that the two sides of the BOS maintain a distinct epigenetic state, we additionally tested whether the difference in density of H3K4me3 peaks across the BOS was larger than would be expected in random adjacent and distal regions. In this case we extended the BOS sides to 500kb regions and compared the absolute difference in the proportion of these regions covered by peaks to random adjacent and distal regions. We compared these values to two types of randomly permuted regions with the same size and chromosomal distribution at the BOS regions. For the first permutation analysis we chose 1,000 groups of 67 adjacent genomic regions (or separated by the size of the BOS to mimic intervals) and for the second type we chose 1,000 sets of 67 distal region pairs. We then calculated two-sided group-wise p-values by counting the number of sets of regions with average  values as extreme as those observed in the BOS regions. Indeed, we find that the meth, CpG, and H3K4me3 values are higher in BOS regions than would be expected in adjacent regions in gibbon and are generally within the distribution for distal regions **(Supplemental Table S4)**. Finally, we repeated the permutation test in human and rhesus reconstructing *in silico* the gibbon rearrangements. As expected, in both species, regions flanking *in silico* BOS were significantly different from adjacent regions in meth, CpG, and H3K4me3 whereas they appeared similar to distal regions **(Supplemental Table S4).**

Here we also show the Barbell plots (ranked) for human and rhesus **(Supplemental Fig S13A)** to highlight the difference in residual methylation and CpG density between the two sides of the BOS as shown for gibbon in the main text **(Figure 7)**. Scatter plots show the relationship between the change in residual methylation across breakpoints and the change in CpG density across breakpoints between species **(Supplemental Fig S13B)**.

**REFERENCES CITED**

Karolchik, D., Hinrichs, A.S., Furey, T.S., Roskin, K.M., Sugnet, C.W., Haussler, D., and Kent, W.J. (2004). The UCSC Table Browser data retrieval tool. Nucleic Acids Res *32*, D493-496.

Kruse, K., Hug, C.B., Hernandez-Rodriguez, B., and Vaquerizas, J.M. (2016). TADtool: visual parameter identification for TAD-calling algorithms. Bioinformatics *32*, 3190-3192.

Ruiz-Herrera, A., and Robinson, T.J. (2008). Evolutionary plasticity and cancer breakpoints in human chromosome 3. Bioessays *30*, 1126-1137.

Shen JC, R.W.I., Jones PA (1994). The rate of hydrolyticdeamination of 5-methylcytosine in double-stranded DNA. Nucl Acids Res *22*, 972.

Smit, A., Hubley, R. (1996). RepeatMasker Open-3.0.

Team, R.D.C. (2008). Language and Environment for Statistical Computing.

Vietri Rudan, M., Barrington, C., Henderson, S., Ernst, C., Odom, D.T., Tanay, A., and Hadjur, S. (2015). Comparative Hi-C reveals that CTCF underlies evolution of chromosomal domain architecture. Cell Rep *10*, 1297-1309.

Zhou, X., Cain, C.E., Myrthil, M., Lewellen, N., Michelini, K., Davenport, E.R., Stephens, M., Pritchard, J.K., and Gilad, Y. (2014). Epigenetic modifications are associated with inter-species gene expression variation in primates. Genome Biol *15*, 547.
