# Supplementary material for: Epigenetic maintenance of topological domains in the highly rearranged gibbon genome
Source: HighWire-hosted journal article supplement (doi:10.1101/gr.233874.117), 2018-06-18
Supplement: Supplemental_Table_S1.xlsx [file Supplemental_Table_S1.xlsx]

## Sheet: Mapping stats
Organism	Individual/BioSample	GEO Accession	Source of dataset	Run name	Analysis performed	Replicate	Files	Genome	R.E.	MAPQ	Read pairs	Read lens	Normal paired		Chimeric paired		Chimeric Ambibuous		Unmapped		W/ Ligation Motif		Alignable		Unique		PCR duplicates		Optical Duplicates		Library complexity	Intrafragment		Below MAPQ		HiC contacts		W/ Ligation motif		3' Bias	Inter-chromosomal		Intra-chromosomal		Short Range (<20Kb)		Long Range (>20Kb)
Nomascus leucogenys	Vok (ISIS# NLL600)	In progress	Lazar et al.	DNA160325LC_Vok2_SPR1C_S1 (temporary)	Permutation and 2D-histogram	1	DNA160325LC_Vok2_SPR1C_S1_R1_001.fastq.gz, DNA160325LC_Vok2_SPR1C_S1_R1_002.fastq.gz	Nleu3.0	DpnII	30	385487892	75	323276863	0.8386	30426360	0.0789	12442627	0.0323	19342042	0.0502	135785581	0.3522	353703223	0.9175	286228010	0.7425	67323196	0.1746	152017	0.0004	806319507	31985123	8.30% / 11.17%	56458933	14.65% / 19.73%	197783954	51.31% / 69.10%	74836067	19.41% / 26.15%	65%-35%	33893899	8.79% / 11.84%	163890055	42.51% / 57.26%	112126839	29.09% / 39.17%	51759923	13.43% / 18.08%
Homo sapiens	GM12878	GSM1608505	Gruber et al. 2015	SRR1802420		1	SRR1802420_R1.fastq,SRR1802420_fix_R2.fastq	hg38	Hind III	30	184955533	101	129712708	0.7013	48605751	0.2628	5187692	0.028	1449382	0.0078	113192026	0.611996	178318459	0.9641	172122310	0.9306	6196149	0.0335	0	0	2506115835	2891195	1.56% / 1.68%	25814928	13.96% / 15.00%	143416187	77.54% / 83.32%	67814996	36.67% / 39.40%	96% - 4%	32584194	17.62% / 18.93%	110831993	59.92% / 64.39%	34065380	18.42% / 19.79%	76766607	41.51% / 44.60%
Macaca mulatta	SAMN03292449	GSM1587705	Vietri Rudan et al. 2015	SRR1771328	2D-histogram	1	SRR1771328_1.fastq.gz, SRR1771328_2.fastq.gz	RheMac8	Hind III	30	180143310	75	152547903	0.8468	20943243	0.1163	3376252	0.0187	3275912	0.0182	82255723	0.4566	173491146	0.9631	165827059	0.9205	7664087	0.0425	0	0	1905384076	18603780	10.33% / 11.22%	90601054	50.29% / 54.64%	56622225	31.43% / 34.15%	24653187	13.69% / 14.87%	93% - 7%	8736138	4.85% / 5.27%	47886087	26.58% / 28.88%	17085829	9.48% / 10.30%	30800253	17.10% / 18.57%
Oryctolagus cuniculus	SAMN03292452	GSM1587703	Vietri Rudan et al. 2015	SRR1771326	Permutation and 2D-histogram	1	SRR1771326_1.fastq.gz,SRR1771326_2.fastq.gz	oryCun2	Hind III	30	181156401	75	157185976	0.8677	13860791	0.0765	3080613	0.017	7029021	0.0388	37869200	0.209	171046767	0.9442	160096586	0.8837	10950181	0.0604	0	0	1278268197	55340482	30.55% / 34.57%	33993525	18.76% / 21.23%	70762579	39.06% / 44.20%	21315196	11.77% / 13.31%	85% - 15%	16079538	8.88% / 10.04%	54683041	30.19% / 34.16%	19583339	10.81% / 12.23%	35099649	19.38% / 21.92%
Mus musculus	SAMN03292456	GSM1587702	Vietri Rudan et al. 2015	SRR1771323		2	SRR1771323_1.fastq.gz, SRR1771323_2.fastq.gz	mm10	Hind III	0	106902507	101	79724268	0.7458	21420046	0.2004	3542272	0.0331	2215921	0.0207	39247891	0.3671	101144314	0.9461	98343685	0.9199	2800629	0.0262	0	0	1792533482	32576675	30.47% / 33.13%	11528858	10.78% / 11.72%	54238152	50.74% / 55.15%	23618021	22.09% / 24.02%	94% - 6%	12006470	11.23% / 12.21%	42231682	39.50% / 42.94%	14907470	13.94% / 15.16%	27324196	25.56% / 27.78%
				SRR1771324		2	SRR1771324_1.fastq.gz, SRR1771324_2.fastq.gz	mm10	Hind III	0	104059131	100	78599321	0.7553	20572103	0.1977	3286464	0.0316	1601243	0.0154	37993164	0.3651	99171424	0.953	96787032	0.9301	2384392	0.0229	0	0	2029173272	32151678	30.90% / 33.22%	11190518	10.75% / 11.56%	53444836	51.36% / 55.22%	23195750	22.29% / 23.97%	94% - 6%	11796624	11.34% / 12.19%	41648212	40.02% / 43.03%	14711892	14.14% / 15.20%	26936310	25.89% / 27.83%
				SRR1771325	2D-histogram	2	SRR1771325_1.fastq.gz, SRR1771325_2.fastq.gz	mm10	Hind III	0	113803927	100	85780185	0.7538	22531159	0.198	3592373	0.0316	1900210	0.0167	41693875	0.3664	108311344	0.9517	105476057	0.9268	2835287	0.0249	0	0	2032547706	35032187	30.78% / 33.21%	12204952	10.72% / 11.57%	58238918	51.17% / 55.22%	25299917	22.23% / 23.99%	94% - 6%	12881118	11.32% / 12.21%	45357800	39.86% / 43.00%	15915433	13.98% / 15.09%	29442357	25.87% / 27.91%
				Combined replicates for this study	Permutation	2	rep2_comb_R1.fastq	mm10	Hind III	30	324765565	100-101	257035950	0.7915	43102210	0.1327	19525623	0.0601	5101782	0.0157	99853435	0.3075	300138160	0.9242	265065876	0.8162	35072284	0.108	0	0	1182120184	132117343	40.68% / 49.84%	31055886	9.56% / 11.72%	101892647	31.37% / 38.44%	44412917	13.68% / 16.76%	94% - 6%	22157436	6.82% / 8.36%	79735211	24.55% / 30.08%	27760699	8.55% / 10.47%	51974493	16.00% / 19.61%
Canis lupus familiaris	SAMN03292453	GSM1587707	Vietri Rudan et al. 2015	SRR1771330		1	SRR1771330_1.fastq.gz, SRR1771330_2.fastq.gz	canFam3	Hind III	0	125226987	75	105848972	0.8453	15320625	0.1223	1433371	0.0114	2624019	0.021	45595406	0.3641	121169597	0.9676	96993244	0.7745	24176353	0.1931	0	0	261747030	12777789	10.20% / 13.17%	9413107	7.52% / 9.70%	74802348	59.73% / 77.12%	27033494	21.59% / 27.87%	95% - 5%	20460633	16.34% / 21.09%	54341715	43.39% / 56.03%	18101626	14.46% / 18.66%	36240075	28.94% / 37.36%
				SRR1771331	2D-histogram	1	SRR1771331_1.fastq.gz, SRR1771331_2.fastq.gz	canFam3	Hind III	0	157353540	100	99589217	0.6329	51762454	0.329	3929767	0.025	2072102	0.0132	79142062	0.503	151351671	0.9619	114268135	0.7262	37083536	0.2357	0	0	256027370	15394059	9.78% / 13.47%	8911448	5.66% / 7.80%	89962628	57.17% / 78.73%	38836085	24.68% / 33.99%	95% - 5%	24545069	15.60% / 21.48%	65417559	41.57% / 57.25%	21685639	13.78% / 18.98%	43731911	27.79% / 38.27%
				Combined replicates for this study	Permutation	1		canFam3	Hind III	30	282580527	75-100	205438227	0.727	67082878	0.2374	5363301	0.019	4696121	0.0166	124737468	0.4414	272521105	0.9644	175748927	0.6219	96772178	0.3425	0	0	286161095	23434180	8.29% / 13.33%	22673754	8.02% / 12.90%	129640993	45.88% / 73.76%	52302541	18.51% / 29.76%	95% - 5%	35151622	12.44% / 20.00%	94489371	33.44% / 53.76%	30506345	10.80% / 17.36%	63983006	22.64% / 36.41%
