# Supplementary material for: Epigenetic maintenance of topological domains in the highly rearranged gibbon genome
Source: HighWire-hosted journal article supplement (doi:10.1101/gr.233874.117), 2018-06-18
Supplement: Supplemental_Table_S2.xlsx [file Supplemental_Table_S2.xlsx]

## Sheet: Sheet1
		Rearrangement features					Gibbon (Nomascus leucogenys) Nleu3.0				Human (Homo Sapiens) Hg38				Rhesus (Macaca Mulatta) RheMac8				Mouse (Mus musculus) GRCm38				Rabbit (Oryctolagus cuniculus) oryCun2				Dog (Canis familiaris) CanFam3.1
Gibbon chromosome	Breakpoint name	Mechanism	Class	Age	Origin		Chromosome	Start	End		Chromosome	Start	End		Chromosome	Start	End		Chromosome	Start	End		Chromosome	Start	End		Chromosome	Start	End
NLE1	NLE1_2_R_r	Inversion	ClassI	<5 mya	NLE specific		chr1a	23581446	23591446		chr9	111648284	111658284		chr15	27738232	27749192		chr4	59019432	59029682		chr1	1638978	1646959		chr11	66256307	66265394
	NLE1_2_L_r	Inversion	ClassI	<5 mya	NLE specific		chr1a	23571445	23581445		chr9	22278607	22288607		chr15	61666973	61675885		chr4	89545520	89563744		chr1	31528864	31538528		chr11	41442809	41455212
	NLE1_3_R_l	Inversion/centromere	ClassI	<18 mya	Ancestral		chr1a	68741832	68749496		chr9	27264698	27274698		chr15	56601086	56613027		FAILED LIFT OVER				chr1	26260897	26271656		chr11	45392674	45409549
	NLE1_3_L_r	Inversion/centromere	ClassI	<18 mya	Ancestral		chr1a	68734591	68741830		centromere				FAILED LIFT OVER				FAILED LIFT OVER				FAILED LIFT OVER				FAILED LIFT OVER
	NLE1_4_L_r	Translocation	ClassI	<5 mya	NLE specific		chr1a	72315723	72325723		chr9	30938485	30948485		chr15	52913222	52923453		FAILED LIFT OVER				chr1	22483543	22485432		chr11	48630368	48632320
	NLE1_4_R_l	Translocation	ClassI	<5 mya	NLE specific		chr1a	72325724	72335724		chr6	27057270	27067270		chr4	27464502	27472405		chr13	22123253	22124265		chrUn0049	338092	344429		chr35	24482735	24488673
	NLE1_5_L_r	Translocation	ClassIIB	<5 mya	NLE specific		chr1a	81255362	81265362		chr6	36352925	36362925		chr4	37283681	37289867		FAILED LIFT OVER				chr12	26371341	26373309		chr12	5467177	5477374
	NLE1_5_R_l	Translocation	ClassIIB	<5 mya	NLE specific		chr1a	81365879	81375879		chr14	49503884	49513884		chr7	111493202	111500197		chr12	69092771	69097049		chr17	68687101	68694477		chr8	26176351	26180297
	NLE1_6_L_r	Inversion	ClassII	<5 mya	NLE specific		chr1a	106017182	106027182		chr14	73583166	73593166		chr7	135943008	135949863		FAILED LIFT OVER				chr20	31415757	31417018		chr8	46878072	46890400
	NLE1_6_R_l	Inversion	ClassII	<5 mya	NLE specific		chr1a	106028817	106038211		chr14	31446892	31456892		chr7	92855638	92866193		chr12	51999505	52005995		chr17	51276876	51289544		chr8	10695731	10705486
NLE2	NLE2_1_L_r	Translocation	ClassI	<18 mya	Ancestral		chr2	48265682	48275682		chr16	74810209	74820209		chr20	59065654	59081283		chr8	111401129	111407252		chr5	29589498	29592362		chr5	75855368	75860674
	NLE2_1_R_l	Translocation	ClassI	<18 mya	Ancestral		chr2	48255681	48265681		chr5	133107601	133117601		chr6	130799357	130808873		chr11	53252316	53258795		chr3	16121886	16126930		chr11	21364979	21373940
	NLE2_5_L_r	Inversion	ClassIIB	<5 mya	NLE specific		chr2	81205969	81215969		chr16	30031540	30041540		chr6	37864962	37875718		chr7	126816867	126823048		chr6	18425217	18429295		chr6	18058756	18063974
	NLE2_5_R_r	Inversion	ClassIIB	<5 mya	NLE specific		chr2	81216187	81226187		chr16	12029265	12039265		chr20	12095010	12105465		chr16	11380485	11390588		chr6	5464657	5474419		chr6	30775455	30784968
	NLE2_7_L_l	Translocation	ClassI	<18 mya	Ancestral		chr2	90399445	90409445		chr16	19509375	19519375		chr20	18663117	18673384		chr7	118694889	118699424		chr6	8673058	8678484		chr6	25747492	25753668
	NLE2_7_R_l	Translocation	ClassI	<18 mya	Ancestral		chr2	90409446	90419446		chr5	76372929	76382929		chr6	73026233	73036508		chr13	95915990	95923843		FAILED LIFT OVER				chr3	30204271	30210171
	NLE2_8_L_r	Translocation	ClassI	<18 mya	Ancestral		chr2	147447220	147457220		chr5	133095687	133105687		chr6	130785967	130797508		chr11	53260469	53267322		chr3	16110497	16118253		chr11	21354091	21363005
	NLE2_8_R_l	Translocation	ClassI	<18 mya	Ancestral		chr2	147457221	147467221		chr16	74820263	74830263		chr20	59081351	59094665		chr8	111417293	111422211		chr5	29592412	29598802		chr5	75844633	75855368
NLE3	NLE3_2_L_r	Translocation	ClassIIB	<5 mya	NLE specific		chr3	53164742	53174742		chr10	56870698	56880698		chr9	75931692	75941189		chr10	72397444	72400321		chr18	29240054	29256117		chr26	32115924	32121169
	NLE3_2_R_l	Translocation	ClassIIB	<5 mya	NLE specific		chr3	53200939	53210939		chr6	78076197	78086197		chr4	76213100	76220868		FAILED LIFT OVER				chr12	64879949	64885479		chr12	39152912	39166160
NLE4	NLE4_3_L_r	Translocation	ClassI	<18 mya	Ancestral		chr4	93857538	93867538		chr3	58707720	58717720		chr2	83367292	83376123		chr14	8404291	8408630		chr9	25465990	25469763		chr20	31967806	31973821
	NLE4_3_R_l	Translocation	ClassI	<18 mya	Ancestral		chr4	93848290	93857537		chr11	1138785	1148785		chr14	985252	992639		FAILED LIFT OVER				FAILED LIFT OVER				FAILED LIFT OVER
	NLE4_4_L_r	Translocation	ClassI	<18 mya	Ancestral		chr4	133133975	133143975		chr8	20060028	20070028		chr8	19837147	19846822		chr8	68973045	68976748		chr15	4659226	4667580		chr25	36968607	36975928
	NLE4_4_R_l	Translocation	ClassI	<18 mya	Ancestral		chr4	133123974	133133974		chr3	19785347	19795347		chr2	178188492	178196728		FAILED LIFT OVER				chr14	5860093	5864549		chr23	23453265	23464322
NLE5	NLE5_1_L_l	Inversion	ClassI	<18 mya	Ancestral		chr5	35207998	35217998		chr1	212866920	212876920		chr1	153655458	153666042		chr1	191015198	191018421		chr16	60218385	60224615		chr7	11009225	11015318
	NLE5_1_R_l	Inversion	ClassI	<18 mya	Ancestral		chr5	35217999	35227999		chr1	54772304	54782304		chr1	54445903	54455917		chr4	106638632	106645998		chr13	112144127	112148902		chr5	54378612	54385718
	NLE5_2_L_r	Inversion/fission	ClassIIB	<18 mya	Ancestral		chr5	47618850	47628850		chr1	67130138	67140138		chr1	66903214	66914787		chr4	103287344	103299247		chr13	99099366	99113410		chr5	43409043	43421675
	NLE5_2_R_r	Inversion/fission	ClassIIB	<18 mya	Ancestral		chr5	47759983	47769983		chr1	53401515	53411515		chr1	53042130	53050948		chr4	107724736	107731238		chr13	113367401	113371926		chr5	55524790	55532323
	NLE5_3_L_r	Inversion	ClassI	<18 mya	Ancestral		chr5	49096664	49106664		chr1	212847389	212857389		chr1	153675499	153689020		chr1	191026456	191036993		chr16	60232683	60240926		chr7	10969830	11000426
	NLE5_3_R_r	Inversion	ClassI	<18 mya	Ancestral		chr5	49086663	49096663		chr1	54751939	54761939		chr1	54435454	54435455		chr4	106652315	106657521		FAILED LIFT OVER				FAILED LIFT OVER
	NLE5_5_L_r	Translocation	ClassII	<5 mya	NLE specific		chr5	57994079	58004079		chr13	26865664	26875664		chr17	6432260	6441755		chr5	146644343	146648185		chr8	38377049	38386280		chr25	12639502	12646520
	NLE5_5_R_l	Translocation	ClassII	<5 mya	NLE specific		chr5	57977895	57987895		chr1	203767670	203777670		chr1	162850614	162860954		chr1	133679428	133687113		chr16	68125266	68132879		chr38	431862	441988
NLE7	NLE7_1_L_r	Translocation/inversion	ClassII	<5 mya	NLE specific		chr7b	17323199	17333199		chr4	139437314	139447314		chr5	139451600	139457600		FAILED LIFT OVER				FAILED LIFT OVER				FAILED LIFT OVER
	NLE7_1_R_r	Translocation/inversion	ClassII	<5 mya	NLE specific		chr7b	17309241	17319241		chr22	32302313	32312313		chr10	86390733	86400298		chr15	84378620	84383888		FAILED LIFT OVER				chr10	21498456	21503548
	NLE7_2_L_r	Translocation	ClassI	<5 mya	NLE specific		chr7b	39666152	39676152		chr16	16091147	16101147		chr20	15885269	15895326		FAILED LIFT OVER				chr6	10835427	10838968		chr6	27879653	27885903
	NLE7_2_R_l	Translocation	ClassI	<5 mya	NLE specific		chr7b	39656151	39666151		chr4	116139928	116149928		chr5	115255752	115265883		FAILED LIFT OVER				FAILED LIFT OVER				chr32	35494078	35508936
	NLE7_3_L_l	Inversion	ClassII	<5 mya	NLE specific		chr7b	62284285	62294285		chr22	33245854	33255854		chr10	75133571	75145926		FAILED LIFT OVER				chr4	87904419	87912985		chr10	30414763	30417984
	NLE7_3_R_l	Inversion	ClassII	<5 mya	NLE specific		chr7b	62294630	62304630		chr22	32164377	32174377		chr10	74148978	74156001		FAILED LIFT OVER				chrUn0042	745671	747163		FAILED LIFT OVER
	NLE7_4_L_l	Translocation/inversion	ClassI	<5 mya	NLE specific		chr7b	63234376	63243587		chr22	32329784	32339784		chr10	86418076	86426855		chr15	84395289	84398031		FAILED LIFT OVER				chr10	21480243	21488123
	NLE7_4_R_l	Translocation/inversion	ClassI	<5 mya	NLE specific		chr7b	63243591	63253591		chr4	139447332	139457332		chr5	139461897	139471449		chr3	51483876	51489179		FAILED LIFT OVER				chr19	3269093	3275992
NLE8	NLE8_1_L_r	Translocation	ClassI	<18 mya	Ancestral		chr8	4673997	4683997		chr3	146399751	146409751		chr2	155345163	155351759		FAILED LIFT OVER				chr14	39993456	39996671		chr23	41609215	41612370
	NLE8_1_R_l	Translocation	ClassI	<18 mya	Ancestral		chr8	4663996	4673996		chr12	46988819	46998819		chr11	45135097	45138919		FAILED LIFT OVER				FAILED LIFT OVER				FAILED LIFT OVER
	NLE8_3_L_l	Translocation	ClassI	<18 mya	Ancestral		chr8	25542547	25552547		chr8	20079439	20089439		chr8	19856623	19866248		chr8	68983909	68996860		chr15	4676261	4681478		chr25	36944523	36962835
	NLE8_3_R_r	Translocation	ClassI	<18 mya	Ancestral		chr8	25532546	25542546		chr3	19762546	19772546		chr2	178207717	178218397		chr17	53270263	53289205		chr14	5812489	5831684		chr23	23472781	23483544
	NLE8_4_L_r	Translocation	ClassI	<5 mya	NLE specific		chr8	77848620	77858620		chr6	27047252	27057252		chr15	52905848	52913155		FAILED LIFT OVER				FAILED LIFT OVER				FAILED LIFT OVER
	NLE8_4_R_l	Translocation	ClassI	<5 mya	NLE specific		chr8	77858621	77868621		chr9	30948552	30958552		chr15	52913157	52913158		chr4	38633041	38636850		chr1	22472382	22476057		chr11	48636071	48644976
	NLE8_5_L_r	Inversion	ClassI	<5 mya	NLE specific		chr8	85225741	85235741		chr9	38778333	38788333		FAILED LIFT OVER				FAILED LIFT OVER				FAILED LIFT OVER				FAILED LIFT OVER
	NLE8_5_R_r	Inversion	ClassI	<5 mya	NLE specific		chr8	85235744	85245744		chr9	27244460	27254460		chr15	56622970	56631354		chr4	94878726	94879982		chr1	26281624	26289416		chr11	45378737	45384597
	NLE8_6_L_l	Inversion	ClassI	<5 mya	NLE specific		chr8	90539018	90549018		chr9	22307646	22317646		chr15	61635971	61646300		chr4	89576071	89585301		chr1	31494028	31514635		chr11	41465280	41467326
	NLE8_6_R_l	Inversion	ClassI	<5 mya	NLE specific		chr8	90549019	90559019		chr9	111658025	111668025		chr15	27727949	27738487		chr4	59035068	59039927		chr1	1625677	1638177		chr11	66265553	66275697
NLE9	NLE9_1_L_r	Translocation	ClassII	<5 mya	NLE specific		chr9	12421760	12431760		chr1	203756626	203766626		chr1	162862949	162873510		chr1	133688371	133693532		chr16	68134231	68137591		chr38	426011	430275
	NLE9_1_R_l	Translocation	ClassII	<5 mya	NLE specific		chr9	12405460	12415460		chr13	26881905	26891905		chr17	6447412	6457817		chr5	146649866	146653230		chr8	38359397	38367193		chr25	12629367	12635248
	NLE9_2_L_l	Inversion	ClassI	<18 mya	Ancestral		chr9	34923336	34933336		chr1	52099915	52109915		chr1	51683648	51691671		FAILED LIFT OVER				chr13	114627133	114635788		chr15	9226121	9227927
	NLE9_2_R_l	Inversion	ClassI	<18 mya	Ancestral		chr9	34913335	34923335		chr1	181190158	181200158		chr1	186204188	186215596		chr1	155004093	155006576		FAILED LIFT OVER				chr7	14659861	14664077
	NLE9_3_L_r	centromere	ClassIIB	<5 mya	NLE specific		chr9	52885919	52895919		chr4	51817199	51827199		chr5	82975310	82985283		FAILED LIFT OVER				chr2	37650801	37653098		chr13	44802743	44804927
	NLE9_3_R_l	centromere	ClassIIB	<5 mya	NLE specific		chr9	53233420	53243420		chr4	68733785	68743785		FAILED LIFT OVER				FAILED LIFT OVER				FAILED LIFT OVER				FAILED LIFT OVER
	NLE9_4_L_r	Translocation	ClassII	<18 mya	Ancestral		chr9	94235472	94245472		chr10	23655535	23665535		chr9	23857733	23867750		chr2	19862571	19867051		chr16	248580	253027		chr2	9657168	9661283
	NLE9_4_R_r	Translocation	ClassII	<18 mya	Ancestral		chr9	94223095	94233095		chr4	109343597	109353597		chr5	108257251	108266749		FAILED LIFT OVER				FAILED LIFT OVER				FAILED LIFT OVER
NLE10	NLE10_1_L_r	Translocation	ClassII	<18 mya	Ancestral		chr10	5132929	5142929		chr12	100253919	100263919		chr11	100165628	100172783		FAILED LIFT OVER				chr4	79502750	79514355		chr15	39353190	39363459
	NLE10_1_R_l	Translocation	ClassII	<18 mya	Ancestral		chr10	5122424	5132424		chr19	53224880	53234880		chr19	48547271	48555088		FAILED LIFT OVER				chrUn0094	616338	619898		chr1	104807085	104809482
	NLE10_2_L_r	Inversion	ClassI	<18 mya	Ancestral		chr10	40779160	40789160		chr19	36632141	36642141		chr19	32539067	32553143		chr7	30038059	30039479		chrUn0088	1031179	1045822		chr1	116281567	116306460
	NLE10_2_R_l	Inversion	ClassI	<18 mya	Ancestral		chr10	40769159	40779159		chr12	64887580	64897580		chr11	63654050	63662508		chr10	121252607	121257006		chr4	43691395	43701195		chr10	7522784	7530158
	NLE10_3_L_r	Inversion	ClassIIB	<5 mya	NLE specific		chr10	68201939	68204680		chr19	5908445	5918445		chr19	6074609	6086113		chr17	56710574	56715904		chrUn0910	41680	43095		chr20	54173993	54181365
	NLE10_3_R_l	Inversion	ClassIIB	<5 mya	NLE specific		chr10	68204782	68214781		chr19	47819103	47829103		chr19	43208713	43208714		chr7	15879568	15881747		chrUn0393	169245	174098		chr1	108247308	108254076
	NLE10_4_L_r	Inversion	ClassII	<18 mya	Ancestral		chr10	73500559	73510559		chr19	53212251	53222251		chr19	48542356	48547135		chr17	21026302	21027821		chrUn0094	728010	729464		chr1	104812455	104824513
	NLE10_4_R_l	Inversion	ClassII	<18 mya	Ancestral		chr10	73519926	73529926		chr12	100263912	100273912		chr11	100172776	100182942		chr10	89679445	89687759		chr4	79514348	79524197		chr15	39363453	39372131
NLE11	NLE11_1_L_r	Translocation	ClassII	<5 mya	NLE specific		chr11	11323115	11333115		chr20	16638296	16648296		chr10	49815875	49826446		chr2	142970157	142981167		chr4	19492860	19506974		chr24	6193878	6202319
	NLE11_1_R_l	Translocation	ClassII	<5 mya	NLE specific		chr11	11333270	11343270		chr7	80426191	80436191		chr3	113793201	113802913		chr5	18038876	18046751		chr7	35567722	35577390		chr18	20150091	20156512
	NLE11_2_L_r	Translocation	ClassII	<5 mya	NLE specific		chr11	45872345	45882345		chr7	23050396	23060396		chr3	85234220	85244770		chr5	24061168	24062645		chr10	8126699	8134398		chr14	36746055	36753086
	NLE11_2_R_r	Translocation	ClassII	<5 mya	NLE specific		chr11	45883920	45893919		chr19	38804968	38814968		chr19	34544827	34554306		chr7	28832887	28838089		chr5	949135	952917		chr1	114291770	114297630
	NLE11_3_L_l	Translocation	ClassI	<18 mya	Ancestral		chr11	48027015	48037015		chr19	36651952	36661952		chr19	32567305	32580107		FAILED LIFT OVER				chrUn0088	1019054	1024789		chr1	116319032	116332253
	NLE11_3_R_r	Translocation	ClassI	<18 mya	Ancestral		chr11	48037021	48047021		chr12	64867323	64877323		chr11	63633301	63643369		chr10	121265339	121272461		chr4	43657241	43675551		chr10	7504892	7513093
	NLE11_4_L_r	Translocation	ClassI	<18 mya	Ancestral		chr11	70831332	70833573		chr12	47201075	47211075		chr11	45346525	45356958		chr15	97356719	97361768		chr8	192323	194643		chr27	7387698	7392623
	NLE11_4_R_l	Translocation	ClassI	<18 mya	Ancestral		chr11	70833574	70843574		chr3	146532151	146542151		chr2	155229976	155242115		chr9	92252313	92283426		chr14	40123032	40163913		chr23	41660161	41666679
NLE12	NLE12_1_L_r	Inversion	ClassI	<18 mya	Ancestral		chr12	20938734	20948734		chr1	181180162	181190162		chr1	186215592	186225996		chr1	155006712	155014416		FAILED LIFT OVER				chr7	14652059	14659861
	NLE12_1_R_r	Inversion	ClassI	<18 mya	Ancestral		chr12	20928732	20938732		chr1	52070165	52080165		chr1	51655145	51664412		FAILED LIFT OVER				chr13	114669412	114675940		chr15	9244159	9249752
NLE13	NLE13_2_L_r	Translocation	ClassI	<5 mya	NLE specific		chr13	50276188	50286188		chr7	80416348	80426348		chr3	113802896	113814454		chr5	18047919	18052846		chr7	35577800	35583502		chr18	20144046	20149109
	NLE13_2_R_l	Translocation	ClassI	<5 mya	NLE specific		chr13	50266187	50276187		chr20	16648299	16658299		chr10	49826449	49836553		chr2	142981170	142987668		chr4	19486040	19492857		chr24	6186293	6193875
NLE14	NLE14_1_L_r		ClassIIB	<5 mya	NLE specific		chr14	12880421	12890421		chr17	59985623	59995623		chr16	53069317	53082567		FAILED LIFT OVER				chr19	28773530	28783143		chr9	34077534	34085128
	NLE14_1_R_l		ClassIIB	<5 mya	NLE specific		chr14	12890523	12896489		chr17	62292504	62302504		chr16	53707207	53707208		chr11	85032499	85038005		FAILED LIFT OVER				FAILED LIFT OVER
	NLE14_3_L_l	Inversion	ClassIIB	<5 mya	NLE specific		chr14	15044679	15054679		chr17	37925931	37935932		chr16	24991324	25093386		FAILED LIFT OVER				chrUn0032	526905	534995		chr18	25633386	25641504
	NLE14_3_R_l	Inversion	ClassIIB	<5 mya	NLE specific		chr14	15077837	15087837		chr2	47351239	47361239		chr13	48084336	48092284		chr17	87625613	87628518		chr2	138981967	138986567		chr10	49464946	49470978
	NLE14_7_L_r	Inversion	ClassIIB	<5 mya	NLE specific		chr14	43468946	43478946		chr17	19766245	19776245		chr16	19561030	19570928		chr11	61773795	61777691		chr19	3112909	3118885		chr5	40435561	40443944
	NLE14_7_R_l	Inversion	ClassIIB	<5 mya	NLE specific		chr14	43818513	43828513		chr17	16896710	16906710		chr16	16897047	16897048		FAILED LIFT OVER				FAILED LIFT OVER				chr5	39997027	39998911
	NLE14_8_L_r	Inversion	ClassIIB	<5 mya	NLE specific		chr14	45351961	45361961		chr17	17971958	17981958		chr16	18117173	18127137		chr11	60352567	60361270		chrUn0410	152210	157968		chr5	41528035	41535366
	NLE14_8_R_l	Inversion	ClassIIB	<5 mya	NLE specific		chr14	45429845	45439845		chr17	19472140	19482140		chr16	19279979	19279980		FAILED LIFT OVER				FAILED LIFT OVER				FAILED LIFT OVER
	NLE14_9_L_r	Inversion	ClassII	<5 mya	NLE specific		chr14	50150331	50151297		chr2	102241887	102251887		chr13	97654692	97664622		FAILED LIFT OVER				chr2	90161731	90178729		FAILED LIFT OVER
	NLE14_9_R_l	Inversion	ClassII	<5 mya	NLE specific		chr14	50154160	50164160		chr17	82319544	82329544		chr16	76208585	76218324		FAILED LIFT OVER				FAILED LIFT OVER				FAILED LIFT OVER
	NLE14_10_L_r	Translocation	ClassII	<18 mya	Ancestral		chr14	58693861	58703861		chr17	16833564	16843564		chr16	47404017	47413303		chr11	100249645	100259078		chr19	42573672	42581975		chr9	21158593	21167000
	NLE14_10_R_l	Translocation	ClassII	<18 mya	Ancestral		chr14	58703968	58713968		chr2	73384064	73394064		chr13	74478552	74488204		chr6	85587288	85593086		chr2	113001121	113005646		chr17	49503308	49515717
	NLE14_12_L_r	Inversion	ClassII	<5 mya	NLE specific		chr14	86290582	86300582		chr17	82308424	82318424		chr16	76198173	76208235		chr11	121036882	121039547		FAILED LIFT OVER				chr9	45735	50722
	NLE14_12_R_r	Inversion	ClassII	<5 mya	NLE specific		chr14	86279347	86289347		chr2	99290700	99300700		chr13	94520493	94530517		chr1	37948823	37956912		chr2	92933146	92944199		FAILED LIFT OVER
	NLE14_13_L_l	Inversion	ClassII	<18 mya	Ancestral		chr14	94194171	94204171		chr17	74352714	74362714		chr16	67927976	67938342		chr11	114787390	114796615		chrUn0210	319306	327224		chr9	6046962	6055950
	NLE14_13_R_l	Inversion	ClassII	<18 mya	Ancestral		chr14	94204302	94214302		chr17	82489984	82499984		chr16	76379552	76389313		FAILED LIFT OVER				chrUn0168	73390	77541		FAILED LIFT OVER
NLE16	NLE16_1_L_r	Inversion	ClassI	<5 mya	NLE specific		chr16	10282887	10292887		chr8	98045219	98055219		chr8	96681922	96690008		chr15	34442898	34445832		chr3	113851699	113858188		chr13	304439	306988
	NLE16_1_R_l	Inversion	ClassI	<5 mya	NLE specific		chr16	10272886	10282886		chr8	61775800	61785800		chr8	59779816	59789924		chr4	9745642	9748900		FAILED LIFT OVER				chr29	12078243	12087840
	NLE16_2_L_r	Inversion	ClassI	<5 mya	NLE specific		chr16	52473379	52483379		chr8	61765813	61775813		chr8	59769796	59779829		chr4	9738140	9743697		chr3	77451166	77462148		chr29	12073306	12078256
	NLE16_2_R_l	Inversion	ClassI	<5 mya	NLE specific		chr16	52483380	52493380		chr8	98055223	98065223		chr8	96690012	96699908		chr15	34448053	34454013		chr3	113858331	113863655		chr13	307298	315124
NLE17	NLE17_1_L_r	Translocation	ClassII	<5 mya	NLE specific		chr17	9737181	9747181		chr2	168347072	168357072		chr12	55297894	55309944		chr2	68785089	68798251		chr7	108076729	108095241		chr36	13231944	13243930
	NLE17_1_R_r	Translocation	ClassII	<5 mya	NLE specific		chr17	9726849	9736849		chr6	46128549	46138549		chr4	47250134	47258126		chr17	44103117	44107179		chr12	35378213	35388751		chr12	14351334	14359876
	NLE17_2_L_r	Translocation	ClassI	<18 mya	Ancestral		chr17	28940043	28950043		chr7	2603936	2613936		chr3	36605919	36615358		chr5	140662154	140671946		chrUn0568	60790	66275		chr6	14573143	14579387
	NLE17_2_R_l	Translocation	ClassI	<18 mya	Ancestral		chr17	28930042	28940042		chr2	149515158	149525158		chr12	36052847	36062523		chr2	50225763	50231797		chr7	88262132	88266407		chr19	51105701	51108532
	NLE17_5_L_l	Translocation	ClassII	<5 mya	NLE specific		chr17	85746986	85756986		chr19	38840720	38850720		chr19	34575251	34585254		chr7	28810121	28818292		chr5	924844	932289		chr1	114266500	114274782
	NLE17_5_R_l	Translocation	ClassII	<5 mya	NLE specific		chr17	85735861	85745861		chr7	23060536	23070536		chr3	85224072	85234080		chr5	24064068	24074339		chr10	8135156	8146577		chr14	36753222	36767142
	NLE17_6_L_r	Inversion	ClassII	<18 mya	Ancestral		chr17	94145735	94155735		chr19	5899005	5909005		chr19	6065830	6075155		chr17	56715635	56718110		FAILED LIFT OVER				chr20	54181041	54186394
	NLE17_6_R_r	Inversion	ClassII	<18 mya	Ancestral		chr17	94125991	94132534		chr19	46427565	46437565		chr19	41773999	41781465		chr7	16982752	16984374		chrUn0137	49614	52090		chr1	109368876	109378632
NLE18	NLE18_4_L_l	Translocation	ClassII	<18 mya	Ancestral		chr18	59463507	59473507		chr4	109370151	109380151		chr5	108283178	108293948		chr3	130132351	130146575		chr15	40182337	40195027		chr32	29605012	29613845
	NLE18_4_R_l	Translocation	ClassII	<18 mya	Ancestral		chr18	59449444	59459444		chr10	23672420	23682420		chr9	23868618	23876148		chr2	19870612	19873989		chr16	255618	259311		chr2	9646284	9655265
	NLE18_5_L_r	Translocation	ClassIIB	<5 mya	NLE specific		chr18	66307453	66317453		chr5	54883383	54893383		chr6	55801752	55811819		chr13	113271286	113293929		chr11	70866796	70885426		chr4	60654371	60662798
	NLE18_5_R_r	Translocation	ClassIIB	<5 mya	NLE specific		chr18	66297351	66307351		chr4	116013688	116023688		FAILED LIFT OVER				FAILED LIFT OVER				FAILED LIFT OVER				FAILED LIFT OVER
	NLE18_6_L_r	Inversion	ClassI	<5 mya	NLE specific		chr18	86342758	86352758		chr5	76362930	76372930		chr6	73016796	73026234		chr13	95923842	95935907		FAILED LIFT OVER				chr3	30210170	30215407
	NLE18_6_R_r	Inversion	ClassI	<5 mya	NLE specific		chr18	86352759	86362759		chr16	19486906	19496906		chr20	18640438	18650192		chr7	118666499	118673226		chr6	8697143	8707614		chr6	25766926	25776742
NLE19	NLE19_1_L_r	Inversion/fission	ClassI	<5 mya	NLE specific		chr19	27758192	27768192		chr2	27694490	27704490		chr13	27979034	27989339		chr5	31553475	31564208		chr2	158404671	158415399		chr17	21715391	21722067
	NLE19_1_R_r	Inversion/fission	ClassI	<5 mya	NLE specific		chr19	27768193	27778193		chr17	63899225	63909225		chr16	57521178	57529639		chr11	106286047	106287197		FAILED LIFT OVER				chr32	27437057	27438825
	NLE19_2_L_l	Inversion/fission	ClassI	<5 mya	NLE specific		chr19	62671205	62681204		chr17	63906976	63916976		chr16	57527325	57536652		chr11	106299643	106302116		FAILED LIFT OVER				FAILED LIFT OVER
	NLE19_2_R_l	Inversion/fission	ClassI	<5 mya	NLE specific		chr19	62661203	62671203		chr2	27704492	27714492		chr13	27989341	27998904		chr5	31564670	31569229		chr2	158395780	158404671		chr17	21722225	21732146
	NLE19_4_L_l	Inversion/centromere	ClassI	<5 mya	NLE specific		chr19	66563878	66573878		chr17	15179950	15189950		chr16	15319422	15328808		chr11	63182401	63202570		chr19	4757941	4772542		chr5	38752975	38771291
	NLE19_4_R_r	Inversion/centromere	ClassI	<5 mya	NLE specific		chr19	66553877	66563877		chr17	16753869	16763869		chr16	20287545	20298897		chr6	118506692	118509469		FAILED LIFT OVER				chr2	6267519	6273355
NLE20	NLE20_1_L_r	Translocation	ClassII	<18 mya	Ancestral		chr20	2430370	2440261		chr7	2520536	2530536		chr3	36529230	36539532		chr5	140608081	140617171		chrUn0568	19373	25253		chr6	14630089	14639916
	NLE20_1_R_r	Translocation	ClassII	<18 mya	Ancestral		chr20	2491743	2501743		chr2	149486852	149496852		chr12	36030694	36040665		chr2	50211060	50218774		chr7	88237690	88253872		chr19	51088801	51094382
	NLE20_3_L_r	Inversion	ClassI	<5 mya	NLE specific		chr20	81545784	81555784		chr4	3871340	3881340		chr5	4274815	4285133		FAILED LIFT OVER				FAILED LIFT OVER				chr3	60564670	60568332
	NLE20_3_R_r	Inversion	ClassI	<5 mya	NLE specific		chr20	81535783	81545783		chr4	19490045	19500045		chr5	18896583	18908208		chr5	47231966	47245309		chr2	10072181	10084610		chr3	89959333	89968304
NLE21	NLE21_2_L_r	Inversion	ClassI		Ancestral		chr21	52886273	52896273		chr3	15112602	15122602		chr2	51275207	51286967		chr6	92220266	92222049		chr9	10631130	10634843		chr20	5193674	5201615
	NLE21_2_R_r	Inversion	ClassI		Ancestral		chr21	52876272	52886272		chr3	129979110	129989110		chr2	51253426	51264537		chr6	92234827	92241479		chr9	10643173	10651980		chr20	5209835	5217973
	NLE21_3_L_r	Translocation	ClassI	<18 mya	Ancestral		chr21	85118051	85124270		chr11	1198505	1208501		chr14	1035512	1045899		chr7	141816517	141823683		chrUn1103	15750	22853		chr18	45496316	45503984
	NLE21_3_R_l	Translocation	ClassI	<18 mya	Ancestral		chr21	85107999	85117999		chr3	58720218	58730218		chr2	83351756	83364848		chr14	8413316	8417261		chr9	25470778	25476066		chr20	31957375	31965254
NLE22	NLE22_1_L_r	Inversion	ClassII	<5 mya	NLE specific		chr22a	32830170	32840170		chr14	31436886	31446886		chr7	92846678	92855632		chr12	51988212	51999237		chr17	51262930	51276870		chr8	10687415	10695725
	NLE22_1_R_l	Inversion	ClassII	<5 mya	NLE specific		chr22a	32819960	32829960		chr14	73555092	73565092		FAILED LIFT OVER				FAILED LIFT OVER				chr20	31513279	31521885		chr8	46846916	46850499
	NLE22_2a_L_l	Translocation	ClassII	<5 mya	NLE specific		chr22a	57926291	57936291		chr6	46181439	46191439		chr4	47296212	47306182		chr17	44058769	44071881		chr12	35451806	35454823		chr12	14395988	14404324
	NLE22_2a_R_l	Translocation	ClassII	<5 mya	NLE specific		chr22a	57936335	57946335		chr2	168378337	168388337		chr12	55331492	55341266		FAILED LIFT OVER				chr7	108116392	108118461		chr36	13257254	13259523
NLEX	NLEX_1_L_l	Inversion	ClassII		unknown (no data)		chrX	32556311	32566311		chrX	63956606	63966606		chrX	58409298	58417151		FAILED LIFT OVER				chrX	42612669	42624524		FAILED LIFT OVER
	NLEX_1_R_r	Inversion	ClassII		unknown (no data)		chrX	32540796	32550796		chrX	34313938	34323938		chrX	34146827	34203510		FAILED LIFT OVER				FAILED LIFT OVER				chrX	29374709	29378682
	NLEX_2_L_l	Inversion	ClassII		unknown (no data)		chrX	58089115	58099115		chrX	34339222	34349222		chrX	34220354	34230634		chrX	81488596	81497445		chrX	20543094	20554699		chrX	29391792	29406761
	NLEX_2_R_l	Inversion	ClassII		unknown (no data)		chrX	58102911	58112911		chrX	63961277	63971277		chrX	58411911	58419641		FAILED LIFT OVER				chrX	42618184	42632851		FAILED LIFT OVER
