# Supplementary material for: Epigenetic maintenance of topological domains in the highly rearranged gibbon genome
Source: HighWire-hosted journal article supplement (doi:10.1101/gr.233874.117), 2018-06-18
Supplement: Supplemental_Table_S3_.xlsx [file Supplemental_Table_S3_.xlsx]

## Sheet: Sheet2
BOS name	Human coordinates			Genes in flanking BOS/Bound	Patient (from Redin et al. 2016)	Patient phenotype (from Redin et al. 2016)	Mouse phenotype (from Dickinson et al. 2016)
	chr	start (-500Kbp)	end (+500Kbp)
NLE1_5_R	chr14	49470602	50470603	RPS29, LRR1, RPL36AL, MGAT2, DNAAF2, POLE2, KLHDC1, KLHDC2, NEMF, RN7SL3, ARF6, MIR6076, LINC01588			Klhdc2, Nemf - Homozygous - Lethal
NLE1_6_R	chr14	31416098	32416099	STRN3, MIR624, AP4S1, HECTD1, HEATR5A, LOC101927124, DTD2, GPR33, NUBPL, LINC02313	DGAP246	Microcephaly, dysmorphic facies, severe intellectual disability, non-ambulatory, no speech, down slanting palpebral fissures, epicanthal folds, bilateral preauricular pits, microtia bilaterally, atretic external canals, microretrognathia, retroglossia, tapered fingers, spasticity, mild hypospadias, seizures, visual defects, learning defects	Strn3, Hectd1, Nubpl - Homozygous - Lethal
NLE22_1_L	chr14	31416092	32416093				Gpr33 - Homozygous viable
NLE2_5_R	chr16	11633122	12633123	LITAF, SNN, TXNDC11, ZC3H7A, BCAR4, RSL1D1, GSPT1, TNFRSF17, SNX29			Snx29 - Homozygous viable
NLE2_7_L	chr16	19020697	20020698	TMC7, LOC102723385, COQ7, ITPRIPL2, SYT17, CLEC19A, TMC5, GDE1, CCP110, C16orf62, KNOP1, IQCK, GPRC5B			Syt17, Knop1, Gprc5B - Homozygous viable
NLE18_6_R	chr16	19008228	20008229
NLE5_2_R	chr1	53377187	54377188	ECHDC2, SCP2, MIR1273F, MIR5095, MIR1273G, PODN, SLC1A7, CPT2, C1orf123, MAGOH, LOC100507564, LRP8, LINC01771, SLC25A3P1, DMRTB1, GLIS1, NDC1, YIPF1, DIO1			Podn - Homozygous viable; Cpt2 -Homozygous subviable
NLE9_4_L	chr10	23454464	24454465	PTF1A, C10orf67, MIR1254-2, OTUD1, KIAA1217
NLE18_4_R	chr10	23461349	24461350
NLE11_2_R	chr19	38805608	39805609	YIF1B, KCNK6, CATSPERG, PSMD8, GGN, SPRED3, FAM98C, RASGRP4, RYR1, MAP4K1, LOC105372397, EIF3K, ACTN4, CAPN12, LGALS7, LGALS7B, LGALS4, ECH1, HNRNPL, RINL, SIRT2, NFKBIB, CCER2, SARS2, MRPS12, FBXO17, FBXO27, ACP7, PAK4, NCCRP1, SYCN, IFNL3, IFNL4, IFNL2, IFNL1, LRFN1	DGAP152	Obesity, erythematous pustular lesions, developmental delay, behavioral issues, dysmorphic features, attention deficit disorder	Capn12, Lgals7, Ifnl3- Homozygous Viable
NLE17_5_L	chr19	38831360	39831361
NLE14_3_R	chr2	47078378	48078379	LINC01119, MCFD2, TTC7A, STPG4, CALM2, LOC101927043, EPCAM, MIR559, MSH2, KCNK12, HCG2040054, MSH6, FBXO11
NLE17_2_R	chr2	149871672	150871673	KIF5C, LYPD6B, LYPD6, MMADHC, LOC101929231, LINC01931	DGAP235	Significant frontal lobe seizures and developmental delay	Lypd6 - Homozygous Subviable
							Lypd6B -Homozygous Viable
NLE18_4_L	chr4	109791307	110791308	COL25A1, ZCCHC23, SEC24B-AS1, SEC24B, MCUB, CASP6, PLA2G12A, CFI, GAR1, RRH, LRIT3
NLE19_1_L	chr2	27427357	28427358	SLC5A6, ATRAID, CAD, SLC30A3, DNAJC5G, TRIM54, UCN, MPV17, GTF3C2, GTF3C2-AS1, EIF2B4, SNX17, ZNF513, PPM1G, FTH1P3, NRBP1, KRTCAP3, IFT172, FNDC4, GCKR, C2orf16, ZNF512, CCDC121, GPN1, SUPT7L, SLC4A1AP, LINC01460, MRPL33, RBKS, BABAM2, BRE-AS1, MIR4263, LOC100505736			Dnajc5G -Homozygous viable
NLE19_2_R	chr2	27427359	28427360				Eif2B4 - Homozygous - Lethal
NLE19_4_L	chr17	14583267	15583268	LOC101928475, CDRT7, CDRT8, PMP22, MIR4731, TEKT3, TVP23C-CDRT4, CDRT4, CDRT3, TVP23C, CDRT1, TRIM16
NLE21_2_L	chr3	14664109	15664110	CCDC174, C3orf20, LINC02011, FGD5, FGD5-AS1, NR2C2, MRPS25, RBSN, COL6A4P1, CAPN7, SH3BP5-AS1, SH3BP5, METTL6, EAF1, COLQ, MIR4270, HACL1, BTD			Sh3bp5, Hacl1 - Homozygous viable
							MrpS25, Eaf1 - Homozygous - Lethal
NLE21_2_R	chr3	129207953	130207954	IFT122, RHO, H1FOO, PLXND1, TMCC1, TMCC1-AS1, TRH, ALG1L2, LINC02014, FAM86HP, LINC02021, COL6A4P2, COL6A5
Genes in red= homozygous lethal
Genes in blue=homozygous viable
Genes in orange=homozygous subviable
